# Supplementary material for: A series of tetranuclear lanthanide compounds constructed by in situ polydentate ligands: synthesis, structure, and SMM behaviour of the Dy4compound
Source: Royal Society of Chemistry journal article supplement (doi:10.1039/c5ce01818h), 2015-01-01
Supplement: c5ce01818h1.pdf [file c5ce01818h1.pdf]

## Supporting information

### **A Series of Tetranuclear Lanthanide Compounds Constructed by *in-situ* Polydentate Ligands: Syntheses, Structures, and the SMM Behaviour of the Dy<sub>4</sub> Compound**

Shuang-Yan Lin,<sup>a</sup> Xiao-Lei Li,<sup>b</sup> Hongshan Ke,<sup>c</sup> and Zhikun Xu<sup>\*a</sup>

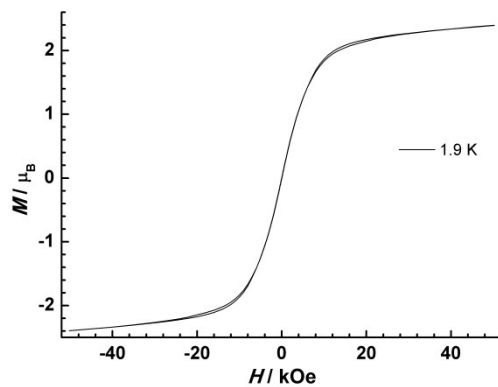

Fig. S1  $M$  vs.  $H$  data of compound 4 at 1.9 K.

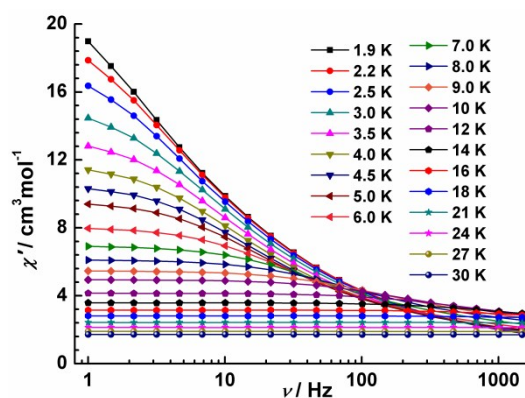

Fig. S2 Frequency dependence of the in phase ac susceptibility of 4 below 30 K, under a zero-dc field. Solid lines are guides for the eyes.

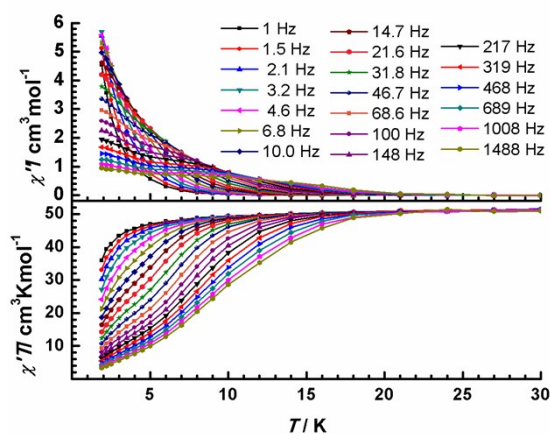

Fig. S3 Temperature dependence of the ac susceptibility for 1 under zero dc field. Solid lines are guides for the eyes.

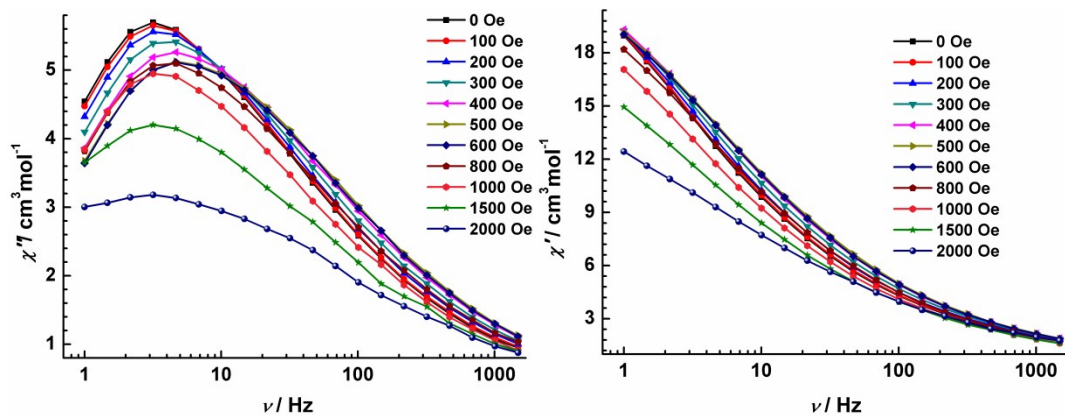

Fig. S4 Frequency dependence of the ac susceptibility at 1.9 K performed at different dc fields for compound 4. Solid lines are guides for the eyes.

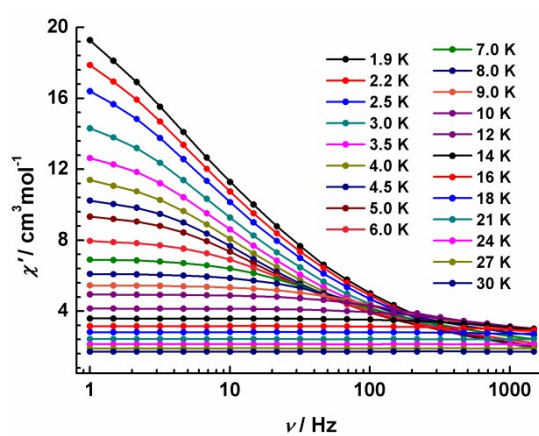

Fig. S5 Frequency dependence of the in-phase ac susceptibility of compound 4 under 500 Oe dc field at 1.9 K. Solid lines are guides for the eyes.

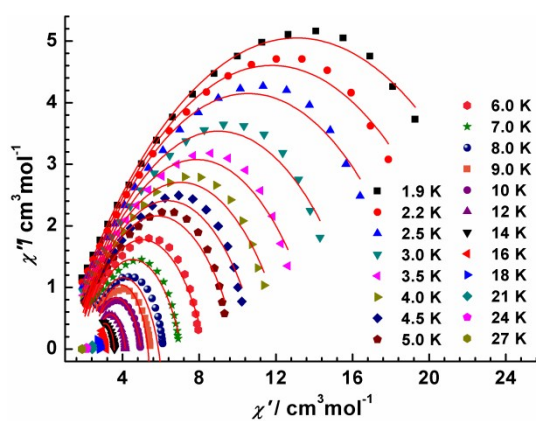

Fig. S6 Cole-Cole plots for compound 2 under zero-dc field below 5 K, solid lines are guides for the eyes. The solid lines are the best fits to the experimental data, obtained with the generalized Debye model.

Table S1. Lanthanide Geometry Analysis by SHAPE Software for Compounds 1-4.

| Shape |     | Capped square antiprism J10 | Capped square antiprism | Tricapped trigonal prism |
|-------|-----|-----------------------------|-------------------------|--------------------------|
| 1     | Nd1 | 1.953                       | 0.945                   | <b>0.725</b>             |
|       | Nd2 | 3.769                       | <b>1.931</b>            | 2.889                    |
| 2     | Sm1 | 3.570                       | 0.847                   | <b>0.696</b>             |
|       | Sm2 | 1.814                       | <b>1.749</b>            | 2.759                    |
| 3     | Gd1 | 1.747                       | 0.802                   | <b>0.699</b>             |
|       | Gd2 | 3.405                       | <b>1.623</b>            | 2.684                    |
| Shape |     | Square antiprism            | Triangular dodecahedron | Bicapped trigonal prism  |
| 4     | Dy1 | 4.128                       | 3.743                   | <b>3.017</b>             |
|       | Dy2 | 3.414                       | <b>1.760</b>            | 2.696                    |

Table S2. Relaxation fitting parameters from Least-Squares Fitting of  $\chi(\omega)$  data.

| 0 field |                                      |                                      |          | 500 Oe field |                                      |                                      |          |
|---------|--------------------------------------|--------------------------------------|----------|--------------|--------------------------------------|--------------------------------------|----------|
| T (K)   | $\chi_s(\text{cm}^3\text{mol}^{-1})$ | $\chi_t(\text{cm}^3\text{mol}^{-1})$ | $\alpha$ | T (K)        | $\chi_s(\text{cm}^3\text{mol}^{-1})$ | $\chi_t(\text{cm}^3\text{mol}^{-1})$ | $\alpha$ |
| 1.9     | 3.61961                              | 21.83854                             | 0.24746  | 1.9          | 0.73991                              | 25.4352                              | 0.50565  |
| 2.2     | 1.06809                              | 23.51895                             | 0.47486  | 2.2          | 0.90904                              | 22.68315                             | 0.49048  |
| 2.5     | 1.17322                              | 20.28112                             | 0.4538   | 2.5          | 1.04809                              | 20.08098                             | 0.47649  |
| 3.0     | 1.29915                              | 16.92354                             | 0.43031  | 3.0          | 1.19981                              | 16.82138                             | 0.4586   |
| 3.5     | 1.38407                              | 14.4908                              | 0.41297  | 3.5          | 1.32868                              | 14.40884                             | 0.44009  |
| 4.0     | 1.45571                              | 12.59261                             | 0.39786  | 4.0          | 1.41413                              | 12.66948                             | 0.42931  |
| 4.5     | 1.5256                               | 11.16032                             | 0.38487  | 4.5          | 1.52361                              | 11.18491                             | 0.4111   |
| 5.0     | 1.59963                              | 10.01827                             | 0.37048  | 5.0          | 1.60785                              | 10.03128                             | 0.39643  |
| 5.5     | 1.75284                              | 8.28285                              | 0.3444   | 6.0          | 1.78203                              | 8.30976                              | 0.36586  |
| 6.0     | 1.92166                              | 7.07298                              | 0.32768  | 7.0          | 1.95675                              | 7.08624                              | 0.34314  |
| 7.0     | 2.11003                              | 6.18395                              | 0.30675  | 8.0          | 2.19473                              | 5.87076                              | 0.28418  |
| 8.0     | 2.28938                              | 5.30126                              | 0.26359  | 9.0          | 2.49367                              | 5.33115                              | 0.19297  |
| 9.0     | 2.37229                              | 4.62446                              | 0.21296  | 10.0         | 2.39614                              | 4.95997                              | 0.27321  |
| 10      | 2.55667                              | 4.09942                              | 0.17608  | 12.0         | 2.57773                              | 4.14763                              | 0.20834  |
| 12      | 2.54516                              | 3.55464                              | 0.10145  | 14.0         | 2.58622                              | 3.562                                | 0.10169  |
| 15      |                                      |                                      |          | 16.0         | 2.24206                              | 3.15174                              | 0.20069  |
